# Supplementary material for: Differential Loss of OAS Genes Indicates Diversification of Antiviral Immunity in Mammals
Source: MDPI journal article supplement (doi:10.3390/vaccines11020419), 2023-02-12
Supplement: s1 [file s1]

**Table S1.** Proteins encoded by genes of the OAS family in mammalian species investigated in this study

| Species                      | Species                     | OAS1                    | OAS2                    | OAS3           | OAS4           | OAS5           | OASL           | OASL2          |
|------------------------------|-----------------------------|-------------------------|-------------------------|----------------|----------------|----------------|----------------|----------------|
| common name                  | scientific name             | acc. nr.                | acc. nr.                | acc. nr.       | acc. nr.       | acc. nr.       | acc. nr.       | acc. nr.       |
| Human                        | <i>Homo sapiens</i>         | NP_058132.2             | NP_002526.2             | NP_006178.2    | n.a.           | n.a.           | NP_003724.1    | n.a.           |
| Bactrian camel               | <i>Camelus bactrianus</i>   | XP_010967910.1          | n.a.                    | n.a.           | XP_045368463.1 | n.a.           | XP_010967907.1 | n.a.           |
| Arabian camel                | <i>Camelus dromedarius</i>  | XP_031299144.1          | n.a.                    | n.a.           | XP_031304545.1 | n.a.           | XP_010993548.1 | n.a.           |
| Alpaca                       | <i>Vicugna pacos</i>        | XP_031526050.1          | n.a.                    | n.a.           | XP_031529082.1 | n.a.           | XP_015095194.1 | n.a.           |
| Dog                          | <i>Canis familiaris</i>     | XP_038292031.1          | NP_001041599.1          | NP_001041556.1 | XP_038516678.1 | n.a.           | NP_001240716.1 | NP_001041558.1 |
| Malayan pangolin             | <i>Manis javanica</i>       | XP_036862000.1*         | XP_017496839.2          | n.a.           | n.a.           | n.a.           | n.a.           | n.a.           |
| Chinese pangolin             | <i>Manis pentadactyla</i>   | See Figure S1 (Mp_OAS1) | See Figure S1 (Mp_OAS2) | n.a.           | n.a.           | n.a.           | n.a.           | n.a.           |
| Chinese rufous horseshoe bat | <i>Rhinolophus sinicus</i>  | XP_019589691.1          | XP_019589650.1          | XP_019589648.1 | n.a.           | n.a.           | XP_019583429.1 | XP_019583430.1 |
| Pallas's mastiff bat         | <i>Molossus molossus</i>    | XP_036133189.1*         | XP_036133188.1          | XP_036132196.1 | n.a.           | XP_036126503.1 | XP_036132778.1 | n.a.           |
| Greater mouse-eared bat      | <i>Myotis myotis</i>        | XP_036210168.1          | KAF6282567.1            | KAF6282568.1   | n.a.           | XP_036199939.1 | XP_036209649.1 | n.a.           |
| Jamaican fruit bat           | <i>Artibeus jamaicensis</i> | XP_036989359.1          | XP_036989379.1*         | XP_036989355.1 | n.a.           | XP_037010350.1 | XP_037012124.1 | n.a.           |

Notes: \*, proteins predicted from genes containing reading frame shifts or premature stop codons; n.a., not applicable (no orthologous gene and protein in this species); acc. nr., GenBank accession number; OAS, 2'-5'-oligoadenylate synthetase; OASL, OAS-like.

>NP\_058132.2 2'-5'-oligoadenylate synthase 1 isoform 1 [*Homo sapiens*]  
MMDLRNTPAKSLDKFIEDYLLPDTCFRMQINHAIDIICGFLKERCFRGSSYPVCVSKVVKGGSSGKGTTL  
RGRSDADLVVFLSPLTTFQDQLNRRGEFIQEIRQLEACQREAFSVKFEVQAPRWGNPRALSFVLSLQ  
LGEGVEFDVLPADFALGQLTGGYKPNPQIYVKLIEECTDLQKEGEFSTCFTELQRDFLKQRPTKLKSLIR  
LVKHWYQNCCKKLGKLPQYALELLTVYAWERGSMTHTFNTAQGFRTVLELVINYQQLCIYWTKYDFKN  
PIIEKYLRRQLTKPRPVILDPADPTGNLGGGDPKGWRQLAQEAELWNYPCFKNWDGSPVSSWILLAESN  
SADDETDDPRRYQKYGYIGTHEYPHFHSRHPSTLQAASTPQAEEDWTCTIL

>NP\_002526.2 2'-5'-oligoadenylate synthase 2 isoform 2 [*Homo sapiens*]  
MNGESQLSSVPAQKLGWFIQEYLYKPYEECQTLIDEMVNTICDVLQEPQFPLVQGVAGGSYGRKTVLR  
GNSDGLTVLFFSFDLKQFQDQKRQRDILDKTGDKLKFCLFTKWLKNNFEIQKSLDGFTIQVFTKNQRISF  
EVLAAFNALSNDNPSPWIYRELKRS�DKNASPGFAVCFTELQOKFFDNRPGLKDLILLIKHWHQQC  
QKKIKDPLSLSPYALELLTVYAWEQGCRKDNFDIAEGVRTVLELIKCQEKLCIYMMVNYNFEDETIRNIL  
LHQLQSARPVILDPVDPNTNVSQDKICWQWLKKEAQWLTSPNLDNELPAPSWNVLPAPLFTTPGHLLDK  
FIKEFLQPNKCFLEQIDSANVIRITFLKENCFRQSTAKIQIVRGGSTAKGTALKTGSDADLVVFNHSLKS  
YTSQKNERHKIVKEIHEQLKAFWREKEEELEVSFEPPKWKAPRVLSFSLKSKVLNESVSFDVLPAPNALG  
QLSSGSTPSPEVYAGLIDLYKSSDLPGEFSTCFTVLQRNFIRSRPTKLKDLIRLVKHWYKECERKLKPK  
GSLPPKYALELLTIYAWEQSGVPDFDTAEGFRTVLELVTVYQQLCIFWKVNYNFEDETVRKFLLSQLQK  
TRPVILDPAEPTGVDVGGDRWCWHLLAKEAKEWLSSPCFKDGTGNPIPPWKVPVKVI

>NP\_006178.2 2'-5'-oligoadenylate synthase 3 isoform 1 [*Homo sapiens*]  
MDLYSTPAAALDRFVARRLQPRKEFVEKARRALGALAAALRERGGRLGAAAPRVLKTIVKGGSSGRGTALK  
GGCDSELVLFDFCKSYVDQARRAAEILSEMRALESWWQNPVPLRLTFPEQSVPGALQFRLTSVDLED  
WMDVSLVPFNVLGQAGSGVKPKPQVYSTLLNSGCGGGEHAACFTELRRNFVNIRPAKLKNLILLVKHWY  
HQVCLQGLWKETLPPVYALELLTIYAWEQGCKDAFSLAEGRLTVLGLIQHQHLCVFWTVNYGFEDPAV  
GQFLQRQLKRPVILDPADPTWDLGNAAHWDLLAQEAASCYDHPFCFLRGMGDPVQSWKGPGLPRAGC  
SGLGHFIQLDPNQKTPENSKSLNAVYPAGSKPPSCAPAGPTGAASIVPSVPGMALDLSQIPTKELDRFI  
QDHLKPSPPQFQEQVKKAIIDILRCLHENCVHKASRVSKGGSFGRGTDLRDGCDELIIIFLNCFTDYKDQG  
PRRAEILDEMRAQLESWWQDQVPSLSLQFPEQNVPEALQFQLVSTALKSWTDVSLLPADFVAGQLSSGK  
PNPQVYSRLLTSGCQEGEHKACFAELRRNFMNIRPVKLKNLILLVKHWYRQVAAQNGKGPAPASLPPAY  
ALELLTIYAWEQGCRQDCFNMAQGFRTVLGLVQHQQLCVYWTVNYSTEDPAMRMHLLGLRKPRPLVLD  
PADPTWNVGHGSWELLAQEAALGMQACFLSRDGTSVQPDVMPALLYQTPAGDLDFKIFSEFLQPNRQFL  
AQVNKAVDTICSLKENCERNSPIKVIKVVKGGSSAKGTALRGRSDADLVVFLSCFSQFTEQGNKRAEII  
SEIRAQLEACQQRQFEVQFEVSKWENPRVLSFSLTSQTMLDQSVDFDVLPADFALGQLVSGSRPSSQVY  
VDLIHYSYNAGEYSTCFTELQRDFIISRPTKLKSLIRLVKHWYQCTKISKGRGSLPPQHGLELLTVYAW  
EQGGKDSQFNMAEGFRTVLELVTVYRQLCIYWTINYNKDKTVGDFLQQLKQKPRPIILDPADPTGNLGH  
NARWDLAKEAACTSALECCMGRNGIPIQPWPVKA

>NP\_003724.1 2'-5'-oligoadenylate synthase-like protein isoform a [*Homo sapiens*]  
MALMQELYSTPASRLDSFVAQWLQPHREWKEEVLDVAVTVEEFLRQEHFQGKRGLDQDVRVLKVVKVSF  
GNGTVLRSTREVELVAFVLSCHFQEAQAKHKKDVLRLIWKTMWQSQDLDLGLDLRMEQRPVDPALVFTI  
QTRGTAEPITVTIVPAYRALGPSLPSQPPPEVYVSLIKACGGPGNFCPSFSELQRNFVKHRPTKLKSL  
RLVKHWYQYVYKASPRANLPPLYALELLTIYAWEMGTEEDENFMLEDEGFTTVMDDLLEYEYICIIYWTKY  
YTLHNAIIEDCVRKQSLKERPIILDPADPTLNVAEGYRWDIVAQRASQCLKQDCCYDNRENPISSWNVKR  
ARDIHLTVQGRGYPDFNLIVNPEYPIRKVKEKIRTRGYSGLQRLSFQVPGSERQLLSRCSLAKYGIFS  
HTHIYLLLETIPSEIQVFKNPDGGSYAYAINPNSFILGLKQIEDQQLPKKQQLLEFQGGVLDQDWLGLG  
IYGIQSDSTLILSKKKGEALFPAS

>XP\_010967910.1 2'-5'-oligoadenylate synthase 1 isoform X1 [*Camelus bactrianus*]  
MALRDTRANQLDKFIEDNLLPDTFRTQVREAVDICTFLKERCFRGAHPVRVSKVVKGGSSGKGTTLR  
GRSDADLVVFLTNLKSQFQELRRRGEFIQEITRQLEACQREKRFKVKFEIHNSPRANPRALSFMLTSPQL  
DQGVDFDLVLPADFALGQLTRGYRDPKVYIQLIEECESLQKEGEFSPCFTELQRAFLRDRPTKLKSLIRL  
VKHWYQECKQQLGKPLPPQYALELLTVYAWEQGSRKTEFNTAQGFRTVLELVKHKQDLCIYWENYYSLEN  
PIIGCYLKKQLGKLRPVILDPADPTGNIGGGDPRSWQRLAEEATAWLSYPCLLKWDGSPVDSWHVPPRKD  
SYWTHEACDDCQHWESFRPITLQGGRRPPEEENWSCVIL

>XP\_045368463.1 2'-5'-oligoadenylate synthase 1-like isoform X1 [*Camelus bactrianus*] = OAS4  
MTFSPWIYSRMGVPVGNCRGSFLIPRCQLRQCGPGASSCHNSSQIRSSLMVAGSTCLLADLKLHLYRKL  
HLCNDSDEAQLCALALLPYQVDFVKASVSRVKELIRLMMHWFKTSFASTTEENKFRRLPSSYTVELLTIY  
IWERAEPKPLFFSLVQGMRAVLKLLVRYAEIDVVWHRHYHRKFPIFVKVYQKHTREFILDPVNPTINVCDT  
CNAWDEVAHVARRSLKPLFSRVRAEPPWLFNTDW

>XP\_010967907.1 2'-5'-oligoadenylate synthase-like protein isoform X1 [*Camelus bactrianus*]  
MALPQELFDTPAYKLTFVQQLHPSREWKEEVLEVVRTVEYSLRKKCFQRKSRLDKEVWVQKVIKVSGL  
GNGTMLGNTTEVELVVLSCFRSFQEEAKHHQIRLNLIIYKLLYQDLDLALQLQDLRLVQGAPCEVVSFT  
VQTRETGEPITVTIVPAFAGALEYLHKPQPPPEVYVSLIKACNVPGNFSFSELQKNFIKHPAKLKL  
LRLVLKHWYLEYVKALCPANLPPLYALELLTIYAWEVGTQENENFDLDRGLVTVMSSLLTKYQSLCIFWTK  
YTFVTNTIYEDFVRKELKNERPIILDPADPTNHNVARGYKWTETVQRARQCLKQNCYNNKHQVCSWNVKS  
ARDIQVTVEQCGYPDLTLTVNPKYKLIKEIKEEIQETLGSSAVLRLSFQEPSEGERQLLSRDRYLASYGIFS  
NTRICLLETVPPEIQLFVKNPSGWSHSYAVDPNSLILDLKQQLIEEKEELFREEQQLLEFQGGVLDQDWLGLG  
ICGFQSDSTLILSKKKAGEAQFLPR

>XP\_031299144.1 2'-5'-oligoadenylate synthase 1 [*Camelus dromedarius*]  
MALRDTRANQLDKFIEDNLLPDTFRTQVREAVDICTFLKERCFRGAHPVRVSKVVKGGSSGKGTTLR  
GRSDADLVVFLTNLKSQFQELLRHGEFIQEITRQLEACQREKRFKVKFEIHNSPRANPRALSFMLTSPQL  
DQGVDFDLVLPADFALGQLTRGYRDPKVYIQLIEECESLQKEGEFSPCFTELQRAFLRDRPTKLKSLIRL  
VKHWYQECKRRNGKEGALPPQYALELLTVYAWERGSSEFNTAQGFRTVLELVKHKQDLCIYWENYYSL  
ENPIIGRYLKKQLGKPRPVILDPADPTGNVAGRDGSGWLLAQEAATWLRYPCLTECNGSPVSTWEVQEA

LPARSACTGSPARSIVMALRDTRANQLDKFIEDNLLPDPFRTQVREAVDIICTFLKERCFRGAHPVRV  
SKVVKGSSGKGTTLGRSDADLVVFLTNLKSFEQLCRRGEFIQEITRQLEACHREKKFKVMFKIHNS  
YANPRALS FALTS PQLDQGVFVDLPADALGQLTRGYRDPDKVYIQLIECESLGKEGEFS PCFTELQR  
AFLRDRPTKLKSLIRLVKHWYQECKQQLGKPLPPQYALELLTVYAWEQGSRKTEFNATQGFRTVLELVRK  
HQDLICIWENYYSLENPIIGRYLKKQLRKPRPILDPADPTGNIGGGDPRSWQRLAEAEATAWLSYPCLKK  
WDGSPVDSWHVPRKDSYWTHEACDDCQHWEFSRPRITLQGGRPPEEENWSCVIL

>XP\_031304545.1 2'-5'-oligoadenylate synthase 1-like isoform X1 [*Camelus dromedarius*] = OAS4  
MTFSPWIYSRMGVPVGVHNCRGSLIPRCQLRQCGPGASSCHNSSQIRSSLMVAGSTCLLADLKLHLYRKL  
HLCNDSDEAQLCALALLPYQVDFVKVSVSRVKELIRLMMHWFKTSFASTTEENKFRRLPSSYTVELLTIY  
IWERAEEKPLFFSLVQGMRAVLKLLVRYAEIDVVWHRHYHRKFPIFVKVYQKHTRFILDPVNPTINVCDT  
CNAWDEVAHVARRSLLKPLFSRVRAEPPWLFNTNDW

>XP\_010993548.1 2'-5'-oligoadenylate synthase-like protein isoform X2 [*Camelus dromedarius*]  
MALPQELFDTPAYRLTTTFVQQCLHPSREWKEEVLVVRTVEYSLRKKCFQRKSRLDKEVWVQKVIKDLLA  
LQLQDLRLVQGPAPCEVVSFTVTQRETGEPITVTLVPAFGALELYLHKPQPPEVYVSLIKACNVPGNFSP  
SFSELQKNFIKHRPAKLKSLRLVVKHWYLEYVKALCPRANLPPLYALELLTIYAWEVGTQENENFDLDRG  
LVTVMSLLTKYQSLCIFWTKYTFQNTIIEFVRKELKNERPIILDPADPTHNVARGYKWETVSQRARQC  
LKQNCYNNKHQVCSWNVKSALDIQVTVEQCGYPDLTTLTVNPKYKLIKEIKEEIQETLGSSAVLRLSFQEP  
SGERQLLSRDYLASYGIFSNTRICLLETVPPEIQLFVKNP SGWSHSYAVDPNSLILDLKQQIEEKEELF  
REEQQLEFQGGVQLQDWWRLGICGFQDSDTLILSKKKAGEAQFLPR

>XP\_031526050.1 uncharacterized protein LOC102530627 [*Vicugna pacos*] = OAS1-like  
MDSFPTGQLTRDYPDPKVIYIQLIKECESLGKEGEFS PCFTELQRAFLRDRPTKLKSLIRLVKHWYQECK  
SRNGKKRALPPQYALELLTVYAWERGSRSPEFNATQGFRTVLELVLKHQDLICIWEKYYSFETPIIGDYL  
KKQLGKPRPVILDPADPTGNVAGRDPSSWQLLAQEAACVCLGYPCFREWNGSPVSAWKVQCWYETQAPESS  
TDPPTGPRTHQSGQLPTEBERLKRTKVEATEMRVEASEMCCLRLCLGPRLHQGAQCDVLPASHALGQLTRGY  
RDPDKVYIQLIKECESLGKEGEFS PCFTELQRAFLRDRPTKLKSLIRLVKHWYQECKRQKGKPLPPQYAL  
ELLTVYAWEQGSGKTEFNMAQGFRTVLELVLKHQDLICIWEKYYSFETPIIGDYLKKQLGKPRPVILDP  
DPTGNIGGGDRHSWQRLAEAEAAWLSYPCLKKWDGSPVDSWHVLPKDSYWTHEACDDGQHWEFSRPRIT  
LQGGRPASEEENWTCVIL

>XP\_031529082.1 2'-5'-oligoadenylate synthase 1-like isoform X1 [*Vicugna pacos*] = OAS4  
MGVFGVHNCRGSLIPRCQLRQCGPGASSCHNSSQIRSSLMVAGSTCLLADLKLHLYRKLHLCNDSDEAQ  
LCALALLPYQVDFVKASVSRVKELIRLMMHWFKTSFASTTEENKFRRLPSSYTVELLTIYIWERAEEKPLF  
FSLVQGMRAVLKLLVRYAEIDVVWHRHYHRKFPIFVKVYQKHTRLFILDPVNPTINVCDTCNAWDEVAHV  
ARRSLLKPLFSRVRAEPPWLFNTNDW

>XP\_015095194.1 2'-5'-oligoadenylate synthase-like protein isoform X1 [*Vicugna pacos*]  
MALPQELFDTPASKLTAFAVHCHLHPSQEWKKEVLEVVRTVGHSLRKNCFQRKSSLDKEVRVQKVIKVG  
GNGTVLRNTEVEVLVFLSCFRSFQEEAKHHQRIILNLIYEKLLYCQDLLALQLQDLRLVRGNPCEVVSFT  
VQRETGEPITVTLVPAFGALKCHPKYQPPEVYVSLIKACNVPGNFSPSFSELQKFIKHRPAKLKSL  
LRLVLKHWYLEYVKALCPRANLPPLYALELLTIYAWEVGTQENENFRDLRGLVTVMSSLLKEYQSLCIFWTK  
YTFQNTIIEFVRKELKNERPIILDPADPTHNVARGYKWETVAQKARQCLKQNCDDNKDRVCSWNVKS  
TRDIQVTVEQWGYPDLTTLTVNPEYPIKKVKEEIQETLGSSAVLRLSFQEP SGERQLLSRDSLASYGIFS  
NTRICLLETVPPEIQLFVENP SGWSHSYAVDPNSLILDLKQQIEQKEGLFIEEQQLEFQGGVQLQDWWRLG  
ICGFQDSDSTLILSKKKAGEAHFLPR

>XP\_038292031.1 2'-5'-oligoadenylate synthase 1 isoform X1 [*Canis lupus familiaris*]  
MPLEKDTPAKDLDRFIENYLLPDTQFRQVKEATHIISTFLKERCFQGAHPVRVSKVVKGSSGKGTTL  
RGRSDADLVVFLNLLKSFEQLEKRGQFIWEIKRQLEACQREETFEVYFEVQSLQWEKPRALS FVLKSPQ  
LGEGVEFDVLPADFGQLCAGAKPAPQVYSTLLHSGCQGGHEAACFAELRRNFVNVRPAKLKSLILLVKHWY  
LVKHWYQKCKQKLKPLPPQYALELLTVYAWERGNHQTEFITAQGFQTVLKLVLNYYQQLCIHWTKYYNFE  
TPIIKQYLMRQLAKPRPVILDPADPTGNVAGRDYTGWQRLAQEARVWLSYPCFKKRDGSPVGSWDVLL  
EEDYEDNWITCEHRTYSYHDYGWRPVSSGSPNTGMTQSI PQEENWMCTIL

>NP\_001041599.1 2'-5'-oligoadenylate synthase 2 [*Canis lupus familiaris*]  
MGIWGS HLYSVQPERLDEL IQNSLRPYGECQKQIDDAVD TICALQETE QIPTVLSVQGGSYGRKTVLR  
GNSDGMIVIFVSDLEQFQDQKRSQDKIILNKIWLKACQLAMKLPKMEVQRFRDGLIFQLSTKWQSITF  
KVLPAYNALGLSEKPSQIYRELKRALDMTKAHPGEFSICFTELQKQFFHKYPRKLKDLILLVYKYQQC  
QEKLGSPLLTMYALELLTVYAWEQGCGAENFDIAEGIRTVLGLIRQQEQLCVYWIVNYNFENETVRN  
ILLSQLRSSRPVILDPDPTNNVSKDNASWQLLKQEAQSWSALS PNESPGPSWNVLPAPLYATPGHLLDKF  
IKDFLQPNKNFLGQIAVAVDFICKFLQKNCFQHSATKVQKTVKGGSTGKGTALKTGSADLVVFPDSLKS  
YTSQKNERCRIKEIHKQLVACQKEFAVKFEISKWKAPRVLSFLSKSVL NESVNFDVLP AFNVLGQV  
NSGSPSPKITYTELINLYKSSNAEGGEFSTCFTELQCSFVASRPTKVVDLIRLVKHWYKQ CERKLKKKGS  
LPKYALELLTIYAWEQGSGAENFDTAEGFRTVLELVTKYQQLCVFWTVNYNFDEETVRNFLTQIQKTR  
PVILDPAEPTGDVGGGDRWCWHLLAKDATEWLSSFCFKDGTGYPVQSWKVPVRII

>NP\_001041556.1 2'-5'-oligoadenylate synthase 3 [*Canis lupus familiaris*]  
MDVYRTPAAALASLVARRLQPSAEFQRAAWRALGALATTLRERGDRAAQPWRVLKTAKGGSAGRGTA  
LRGGCDSEIVIFLDFCKSYKDHSDRAEILKDLWDLQSWWQKPIPLGNFETLWQDRPGVLQFRLASTD  
LENWMDVSLVPAFDALGQLCAGAKPAPQVYSTLLHSGCQGGHEAACFAELRRNFVNVRPAKLKSLILLVKHWY  
RQVCQEEAKREMLPPAYALELLTIYAWEQGCGKDAFSLAQGLRTVLGLIQEYRQLCVFWTLN YGFENPTV  
RSFLSSQLKKPRPVILDPADPTWDVNGATWHWDILAREAESEYHPCFLQTAGDTVPWEGTGLPRAGC  
SGLDHPIQRDDAQRTPGNSSSLNAVPPRAGSRQPSWPA PRPPGPDSITPSTLGRAVDLSQIATKDLDRFI  
QDHLKPNPQFQKQVGKAINVILGCLREKCVYKASRVSKGGSFGRGCDALVIFLNCFDYRDQR  
ARRPEILQEMQAQLESWWQDPVPGLSLEFPEQTVPEALQFRLVSTALESWMDVCLVPAFDVAGQLCAGAK  
PAPQVYSTLLQSGCQGGHEAACFAELRRNFVNVRPAKLKSLILLVKHWYRQVAAQNGQQPACASLPVY

ALELLTIFAWEQGCGEDSFKMAQGLKTVLELVQQHQQLCVYWTVNYSFEDPAIRTHLLGQLQKPRPLILD  
PGDPTWNVGQGSWELLAQEAAVLETQACLRSTEGTSVPQWDVMPALLYQTPAGDLDFKISDFLQPNRQFL  
AQVNKAVDITICSFLENCFQNSAIKVLKVVGGSALAKGTALRGRSDADLVVFLSCFSQFAEQGNRAEII  
SEIRAQLEACQQKQMLEVKFEIPKRENSRVLSFSLKSQTMLDQSVDFDVLPAFNALGQVVSSYRPPSQVY  
VDLIYSYNNAGEYSTCTELQRDFIISRPTKLKSLIRLVKHWYRQCNKMPRGRGSLPPQHGLELLTVYAW  
EQGGSQAQFNMAQGFRTVLELVSYQRQLRVYWTVNYNEDQTVRDFLSRQLRQPRPIILDPAADPTGNLGH  
NARWDLLEATEATACMSALCCTDRDGTPIQPWPVKAAV

>XP\_038516678.1 2'-5'-oligoadenylate synthase 3-like isoform X1 [*Canis lupus familiaris*] = OAS4

MWALKCYKCECCGSDFVSCALKYHFRQKHFGKAPCEKCGQEVLRNLQDHKSQVYDRSAMERHKLWNEN  
LEERNIKHMATEISKTCRMCRRHFGTVFSRKNHEIQEHHTANKRAQMSIGFSPQNMLECKSPQELQRFA  
DENIRPAPGALRAACVAEVGALLQLLRACFPVPASRVIQGGSYVKGTDQGRSEIDVVLSDVFANVNH  
KKQLREGLDALRENKQTSRGNRILMGKRASLSLRFNFLCAEGLHSHSFEIMACCDVLGPAPSTDLRLHL  
YRQLYLCHDSEMAQLWALALLPYQVDFVKASVMRVKELIRLMVHWFRSTFANSTEENKFRRLPSSYTVEL  
LTHIHELWELAGKPLLSLVQGMRAVLKLLVRYAEIDVVVHRHYHPKFPFVVKVQKHTRPFILDPANPTVN  
VCDTCNAWDEVALVARHSLKPLFSRVRAEPPWLFTNNW

>NP\_001240716.1 2'-5'-oligoadenylate synthase-like protein [*Canis lupus familiaris*]

MAQAMELYDTPASKLDSFVAQWLQPHRSWKEEILEAVKTVQQFLREEHFEGDYGPDQEVRLKVVKVGGSF  
NGGTVLNRTLEVLVFLSCFHSFQQAEEHHQAILSLIQKKLWCCRDLALGLEDEVEIIQGVDPALVFTI  
QTRRTAEIITVTIVPAYRALGPSASNSQPYPEVYESLIEAQGGFPNGFSPSFSELQRNFVKHRPTKLKSL  
RLVKHMYLYQYVKAACPRALPPDYALELLTIYAWEMGTQEDSFRLDEGFTTMELFQYEFELCIYWTKY  
YTFQNPVIEDFVRKQLKDRPIILDPAADPTHNVAEGYRWDIVAQRARQCLKQDCCYDNKEKPVPSWNVKK  
ARDIQVTVEQWGYSDILRVNPKYPIKKIQEKMWQSRCCSGLHLYLQELGAKQQLLSSQYSLADYGVFS  
NTRICLVETNSHEIQVFVKNPDGGS DAYTTDAKGFILGLKQQIEYKQGLPRKQQQLQFQGVKLDWLPLQ  
NYGIQHRDTLILSKKKAERFPFLPR

>NP\_001041558.1 54 kDa 2'-5'-oligoadenylate synthase-like protein 2 [*Canis lupus familiaris*]

MALVQKLYETPAERLLAFVERSLQPEGDWKEEVKDAWQRIERFFRDQCFRDELVLDDQEVRLKVVKVGGS  
GKGTTLNYSDDVLDVFLSCFSSFDQQAHHRSIIISFIKKRLIQHKNLAYSITIVPQKETTTRVPRSLSF  
QVQARKTSEVIGVDVLPAYDALGHFSSDFKPSPEIYEDLITSGGPPGEFSPSFTELQRHFVKSCPVKLN  
LLRMVKKHMYLQCLKPKYRNAALPKYAFELLTIYAWEIGTDKSDNFNLDEGFRAVMELLDYEDICRYWT  
KYYDFQNETVRIHIKQQLKECRPVILDPADPTNNLGSEKRWDLVAKEAARCLRQACCRTEPDSPQGWVQP  
ARNVQVLVKKAGEBPQTFSDPHSPIWKMAEKIRTFGFYQQLRSLFQEPGGERQLLSSQQLLAHYGIFS  
KVNIRVLETFPSEIQVFVKDSSGSKPYAIYPEDSIRDLKEKIEEAGGPYVEDQILKFQNRRLWNHRSLS  
DLQIKDCDTITLIRSHRSPGLPMIRLFT

>XP\_036862000.1 LOW QUALITY PROTEIN: 2'-5'-oligoadenylate synthase 1-like [*Manis javanica*]

MGQLRDPATHLDKYIEDQLLPDMHFRVQVNQAIDIISSFLKERCFQSAHSVRVSKVVGGSXGKGTSL  
RGRSDADLVVFLSPSTSFQEQQLQHRGEFVREIRRQLEACQREKKFDVLFVQNPWEKPRALSFMLRSPR  
IQEGVEFDILPAFDVLGGLTSDYRDPDIYVRLMQESQRLGRGGEFSTCTELQRAFLKQRPTKVKSILIR  
LVKRWYQECKKELGKPLPPQYALELLTIYAWEGSMDTEFITAQGFVLTKLVNLNYQQLCIYWTKYITL  
DPFIKRYVMAQLGKPRPIILNPADPTGNVAGGEPNSWPRLAQEARAWLSYPCFKKWDGSSVGSWDVQPKD  
NLCSIP

>XP\_017496839.2 2'-5'-oligoadenylate synthase 2 isoform X1 [*Manis javanica*]

MGNWESRLYSVPPQKLGEFVQNSLRPFEDCQNKIDKTNTICAVLQEAQFPLVISVAKGGSYGRKTVLR  
GNSDGLTVVFASDFEQFDQTKSPSEILHKIRDVLRVWQLTTELAQAQVEVQMVSGTLTIQLSTKRQSITF  
KVLPAFNALGLSDKPSWTYLELKRALDQTHSNPGEFSVCFTTELQQKFFKNHPRKLKDLILLVKYWYEQC  
QEKLYAPLPPVYALELLTIYAWEGGCRTEFDIVEGIRTVLGLILQEQQLCVYVWVINYNFENVNIRNII  
LSQLRSSRPVILDPADPTNNVSKDKMCWQLLKEEARIWLSSSGLNESPGLSWNVLPAPLYTTTGHLLDKF  
IKDFLQPNKIFLEQIERAVKIIRTFLQHNCQFQHSTTKIQKIVQGGSTAKGTALKNGSDADLVVFPDWLNS  
YTSQKNERSRVIREIHKQLQACQKLDLEVKFEISKWKAPRVLSFSLKSKVLNESIDFDVLPAPNVLGHK  
NSHTAPSPSVYSEHINLYSSSDALGGEFSTCTELQRDFVLSRLTKLDLIRLVKHWYRQCEKKLKQKGN  
LPPKYALELLTIYAWEGSGTNTFNTEAGFRTVLELITKYQQLCIFWTVNYNLEDETMRNFLPTQIQRT  
PVILDPAEPTGDVGGDRWCWHLAKEATEWMSLFCFGDTGEPVQAWKVPTVQTPGSCGAGMPITQEM  
FSFRICRTLE

>Mp\_OAS1 [*Manis pentadactyla*] - corrected prediction, partially identical to XP\_036785080.1

MGELRDPATHLDKYIEDQLLPDTHFRVQVNQAIDIISSFLKERCFQRAHSVRVLKVVKGGSSGKGTSL  
RGRSDADLVVFLSPLTSFQEQQLQHRGEFVREIRRQLEACQREKKFDVVFVQNPWEKPRALSFMLRSPR  
IQEGVEFDVLPAPFDVLGGLTRDYRDPDIYIQLIQESQCLGRGGEFSTCTELQRAFLKQRPTKVKSILIR  
LVKRWYQECKKELGKPLPPQYALELLTVYAWEGGSMETEFITAQGFVLTKLVNLNYQQLCIYWTKYITL  
DPFIKRYMMAQLGKPRPVILDPADPTGNVAGGEPNSWPRLAQEARAWLNYPCFKKWDGSSVGSWDVQ  
PRDNLCSIP

>Mp\_OAS2 [*Manis pentadactyla*] - corrected prediction, identical to part of XP\_036785080.1

MGNWESRLYSVPPQKLGEFVQNSLRPFEDCQNKIDKTNTICAVLQEAQFPLVISVAKGGSYG  
RKTVLRGNSDGLTVVFASDFEQFDQTKSPSEILHKIREVLRVWQLITELAAQVEVQMVSGTLTIQLSTK  
RQSITFEVLPAPFNALGFSKPSWTYLELKRALDQTHSNPGEFSVCFTTELQQKFFKNHPRKLKDLILLVK  
YWYEQCEKKLYSPLPPVYALELLTVYAWEGGCRTEFDIVEGIRTVLGLILQEQQLCVYVWVINYNFENV  
TIRNILLSQLRSSRPVILDPVDPPTNNVSKDKMCWQLLQEAQIWLSSSGLNESPGLSWNVLPAPLYTTTGH  
LLDKFIKDFLQPNKIFLEQIERAVKIIRTFLQHNCQFQHSTTKIQKIVQGGSTAKGTALKNGSDADLVV  
PNWLNSYTSQKNERSRVIREIHKQLEACQKLDLEVKFEISKWKAPRVLSFSLKSKVLNESIDFDVLPAP  
NVLGHNKNSHTAPSPSVYSEHIDYSSSDALGGEFSTCTELQRNFVISRPTKLKDLIRLMKHWYRQCEK  
FKQKGNLPPKYALELLTIYAWEGSGTNTFNTEAGFRTVLELITKYQQLCIFWTVNYNLEDETMRNFLLT  
QIQRTRPVILDPAEPTGDVGGDRWCWHLAKEATEWMSLFCFGDTGEPVQAWKVPTVQTPGSCGAGMY

PVTQEMFSFRICRTLE

>XP\_019589691.1 PREDICTED: 2'-5'-oligoadenylate synthase 1 isoform X1 [*Rhinolophus sinicus*]  
MELRNTPAKNLDKFIQDHLPLDKHFRSQVKAIDISICSLKEKCFQHASHSVRVSKVVKGGSSGKGTTLR  
GRSDADLVVFLSLRSEFQEFDRRGEFIQEIRKQLEACQREETFAVEFEVQNHRWTNPRALGVFLKSPTI  
RDGVEFDVLPADFVLADQVTDNYIPDPQIYVDLIQACEHLKKEGEFSTCTELQRAFLRQRPTKLKSLIR  
LVKHWYQTFKEKCGESLPPQYALELLTVYAWERGGEKPEFNQAQGFKTVLELVRGYQQQLWIYWPKYNNFK  
NPVICHYLMKQLEKPRPVILDPADPTGNVGGGDRRRWQRLAQEAETWLSYPCFKNHDGCPVDSWDIQF

>XP\_019589650.1 PREDICTED: 2'-5'-oligoadenylate synthase 2 isoform X1 [*Rhinolophus sinicus*]  
MGNSAPSSMPTQELDAFIQESLRPYEGCQKQIDKAVDTICAAALHEAEFFLVTDVAKGGSYGRETIVLRDHS  
DGTLVIFISDLQTFDQKKMRYEILHKIWNWLKHCQLERKLAAILMSSSSGLVVELSTRWQSITFEVLPA  
FNLALGLEKSPWPTYRELKRSIDMTKASPGFEFVSVCTKLQQNFNNHPRKLKDLILLVKYWYQQCQKKLR  
ALPLLSSYALELLTVYAWEQGCAEDFEIVEGIRTVLGLIKQSRQLCVYWTNINFEDETVRNIVLGQIR  
SRPVILDPDPTNNVSKDISICWQLLKEEAEMWLSCLNESPGPSWNVLPASLQETPGHRLDKFIKDFLQF  
SEAFNLRIHKAVIDIICSLKENCFRYSTTKVQKAVKGGSGAGKGTTLKTGSDADLVVFTSLKSYTSQNT  
RCDI I KEIRKQLEVCQQQERFEVKFEISKWKAPRVLSFSLKSEFDESVDVLPAPFNALDKWKPGSTPS  
PKVYRDLCICLYSSNIVGGEFSTCTELQRDFIISRPTKLKDLIRLVKHWYKQCEKKLKKKGLSPPKYAL  
ELLTIIYAWEQGSLADFTAEGRFTVLELIRRYQQQLCIFTWTVNINFEDETVRDFLLTQLQKTRPVILDP  
EPTGDVGGGDRWCWYLLAKEATEWLSFPCFIDGAGHPVQFWKVPTAQTPGSCGARLHPVVDMEFSFRSRQ  
ILQ

>XP\_019589648.1 PREDICTED: 2'-5'-oligoadenylate synthase 3 isoform X1 [*Rhinolophus sinicus*]  
MDLYRTSATELDRLVISLQPPTEFVETARRALGALGAALRERRGLRDAAPTWRVLKIAKGGSSGRGTAL  
RGGCDSELVIFLDCFKSYKQRLHRPKILKEMQALLKSWCQHPVPGLSLQFPQDTPVELQFRLASTDLE  
NWMDSLVPADFALGQLRSNVKPKPVYSALLDSGCHAGEHAACFAELRRNFVNTSARKLKNLILLVKHW  
YRQVCPEETRRREMPDYLAELELLTIYAWEQGCKDAFSLAQGLRVLGLIQQYQSLCVFWTINYNDFEDPAV  
KRFLQRQLERPRPVILDPADPTWDVGNAGAACNWNLLAQEAESCYDRPCFLQAAGGAVEPWKVPGLPQSG  
DDHVLQDPVQKSLKSDSLDAVQPRPGSRQPSCPAPAPLEAASIPPCPPGMVSDLSQISAKELDRFIQDH  
LKPNPQFQKLVSKAIDVILGRLLQKCVHKASRVSKGGSFGRGTDLRGGCDALVIFLNCFKTYTDQGT  
SEILDDMRAQLESWWQDPVPGSLKFPNQTVPEALQFQLVSTALESWMHVSLLPVFDVAVGQLSSGAKPEP  
QVYSTLLDSGCQGEHAACFAELRRNFVNTRPVKLKNLILLVKHWYHQAQNKKEERPSLPPAYALELLT  
IFAWERGCGEDRFSMAQGLRVLGLVRKHQQQLCVFWTINYSFEDPALRTHLLGQLRKPRPLVLDPADPTW  
NVGQGCWKLLAQEAALQMAGTGTGTPVQPDVMPALLYQTPAWDLDFKIFSEFLQPDQRFLTQVNKA  
VDTICAFELREKCFQNSPIKVLKVVKGGSSAKGTALGRSDADLVVFLSCFSQFTEQGNRRADIISEIRAQ  
LEACQCEKQFEVKFEISKWENPRVLSFSLASQTMLDQSVDFVLPADFALGQLVSRSPSPQVYVDLIHS  
FHNAGEYSSCFTELQRDFIVSRPTKLKSLIRLVKHWYQQCNKMPKGGSLPPQHGLELLTVYAWEQGKGD  
PQFNMAEGFRTVLELVTQYRQLCVYWTINYNRENKTIKDFLEQQRLKPRPIILDPADPTGNLGHNARWDL  
LAKEATACTALCCMGRDGNPIQFPWPVKA

>XP\_019583429.1 PREDICTED: 2'-5'-oligoadenylate synthase-like protein [*Rhinolophus sinicus*]  
MALTPDLYGTSASRLNSFVAQYLQPSREWKEEVLEAVRTVEQFLREETFQGEHGLNQDVRVLKVVKGSF  
NGNVTIRSNTEVELVFLSCFHSFQEEAKHHQTALRLIRKLWLQDILLALGLEVLGLVQGIQDVLVFTI  
HTKDIAEPIITVTPAYRALGSSVTSQPHPEVYENLIEACGYPGNFSPSCFELQRNFVKHRPTKLKSL  
RLVKHWYQQYVKAACRKAMLPPLYTLELLTIYAWEMGTHGDENFNLDGLTTVMELLKEYEFLCIYWTKN  
YTFQNPPIIENFVRKEFKRQRPILDPADPTHNVAEGYRWDIVQASQCLKQDCCYDQENPVPSWNVKSA  
RDIWVTVEQWGYPSLILVNNPYEPFIRKVKELIRLSRGLQLRSLFQTPGSEQLLSSHNCCLADFGIFLD  
TPICLLETVPFETQVFKVKNPDGGSHTAYADPNFSFIVALKQQIEDKQGLIKQQQLEFQGGQLQDWLAFTS  
YGIEDSDTLILSEKKAREVFPFYS

>XP\_019583430.1 PREDICTED: 2'-5'-oligoadenylate synthase-like protein 2 [*Rhinolophus sinicus*]  
MEPSRSLYETPADELDTFVRQSLQPPQRAWKEEVQDAWRDSEFLRDVCFHDELIGDQTRVLKVVKGGSS  
GKGTTLNHSSDVLILFLSCFSSFHQAWLCESILNIIIEKLDHCSRSLAYNITVAQHRAGSRASRSLF  
LVQARKSSDVIVKVDVLPADFALGNISPDCKPRPEIYENLITVGGRPQGFSPSTELQRREVKSRPIKLN  
LLRLVKHWYQFLKRYKTPGLPKYALELLTIYAWEMGTDESENFNLDGLTIVMELLQDYEKICIYWT  
KYDFQNEVVRNFIKQQLKEPRVILDPADPTNNLGRKRDVLAKEAAYCLRQACCTEDSCQDWDVQF  
ARNVQVVVKQTGNPWLKSDVPSPIWKMKPEIKRTFGLTGQQLRSLFQEPGGERQLLSSKRTLADYGIFS  
KVTQVLETTFHDEIQVFVNCSGHSKPYAICPDDSVRLKEKIEDAGGPYVEDQILKFQGRRLRNHCSLS  
ELQIEDSDTIMLVRRGHSS

>XP\_036133189.1 LOW QUALITY PROTEIN: 2'-5'-oligoadenylate synthase 1 [*Molossus molossus*]  
MANSFLAICPRPSPSPVSAHRLPADAGCIARARRCRGGGLDKFIKVHLLSDECFRTQVKEAIAII  
CSFLKERCFRQSALSPVHVKSVKSGPPGGSSGKGTTVRGRSGADLVVFLSLQSFRRSLIREDFIREIK  
KQLRACQKEKRFTVYSEIPNNXDPRLSFKLKSSCLQKEVGFDVLPAYDVRGPVSVMGDYRDPQVCVKL  
IQERKSLGQEGEFPSCFWELRRAFLEQRPXLSPLRLVKRQCKGKGLGQLPPQYXERTDFITAQGFQSV  
WELVLNYQKLCIYXTKYHNTGHPVIXPCLQRQLGKHRPVILDPADPAGNLADGELGGWQRLAQEARVWLS  
YPCSRNQDGSVPVGSWKIQVYGSSSHRSRGRHFDVAYKQHCCSLTMWIIHLCHF

>XP\_036133188.1 2'-5'-oligoadenylate synthase 2 [*Molossus molossus*]  
MENWLFGAYPKTVYSVPAQKLGYYVQTSRLPSEHCQKQIDATVDTICAAALQEVMAIDVAKVPRGRSLNLP  
ELQSLSLSKILLPTGDPDPPKVSRSVSHRLLCRWGGSYGRKTVLRGNSDGTLVIFTSIDLQGFQDQKKSQ  
HEILNTIEWQLKACQCEKRPKTAKEVQRPHGGLAIRLSTWSQSVTFDVLPAFDALGSRDRPSPWTYRELK  
RSLDMTKASPGFEFVSVCTKLQKFFNNHPRKLQDLILLVKDWYQQCQKQASPSWPPSYALELLTVYAW  
QCGCAEDFDIVAGLRTVLGLIKQEQQLCVYWTNINFEDETVRNIMLHQIRSSRPVILDPDPTNNVSKD  
QLCWQLLKEEAQRWLSDPQLQEHGPPWNVLPVPLHETPGHLLDKFIKDFLQPNQTFVLSQISTAVDII  
FLRENCRRSTTKLQKPKVGGFSKGTTLKTGSDADLVVFDVLSLSEYASQORDERCKVIKIEIQALEAFQ  
QAASEQELEVKFEISKWKAPRVLSFSLKSKQLNERVDFDMLPAPFNALDKLKPRWRVYTELISLYKNTDTP  
GGEFSPCTELQRDFVMSRPTKLKDLIRLMKHWYKQCEFRLLKKKGLSPPKYALELLTIYAWEQSGMPKF

DTAEAFRTVLGLVTRYQHLCIFWTVNVDYFENKIVRDFLLTQIQKPRPVILDPADPTGDVGGGNRWCWHLL  
ANEAAEWLCSLLCCKDRAGDPVQSWTVPTVQMPGSCGVCTAPVVMNMLSYRSRGVLD

>XP\_036132196.1 2'-5'-oligoadenylate synthase 3 isoform X1 [*Molossus molossus*]  
MDVYRTPAASLDALVVGSLQLPAEFVGTTRRALGTLETALRECGSRPGPGAAAPPWRVLKTAKGGSFGRG  
TALRGCDSEIIVFLNCFKSYEDQRRARRAETLTEMRALLESWRQSPVPGLSLEFLQDDTPGVLQFRLASA  
DLENWMDVSLAPAFDALGQLSSGTPKDPQIYSTLLDSCQDGEHAACFAELRRNFTNTRPTKLNILLV  
KHWRVQVCPQERRREMPDYALELLTIFAWKCGCKDAFSLAQGLRTVLGLIQHQHLRVFWTTNYGFED  
PAVKKFLLRQLDRPRPVILDPADPSWDVGNAAWHWDLAREAESCYDSPCFLLQAAGGAVQPWEVPGPLPL  
TAPPILRDPAQKTPEDSSSLDAVHPRAGNGQSPCPDPPDSVVAIAPCALEVVS DLSQIPARELDRFIQD  
HLKPQPFQKQVSKAFDVLISCLRENGAHKASRVSKGGSFGRGTDLRGGCDAELIVFLNCFKNYKDQGPL  
CAEVLRLDLRAQLESQGEFVPGTLTKFAAQTTTKALRFQLVSSALKSWMDVSLPVFDDAVGQLSSGTPKDP  
QIYSTLLDSCQDGEHAACFAELRRNFVNSRPVKLNILLVKHWYRQVCPQERRREMPDYALELLTIF  
FAWKGCGKDAFSLAQGLRTVLGLIQHQHLRVFWTTNYGFEDPAVKKFLLRQLDRPRPVILDPADPTWD  
VGNAAWHWDLAREAESCYDSPCFLLQAAGGAVQPWEVPGPLPLAAPPILRDPAQKTPEDSSSLDAVHPR  
GNGQSPCPDPPDSVVAIAPCALEVVS DLSQIPARELDRFIQDHLKPQPFQKQVSKAFDVLISCLRENG  
AHKASRVSKGGSFGRGTDLRGGCDAELIVFLNCFKNYKDQGPLCAEVLRLDLRAQLESQGEFVPGTLTKF  
AAQTTTKALRFQLVSSALKSWMDVSLPVFDDAVGQLSSGTPKDPQIYSTLLDSCQDGEHAACFAELRRN  
FVNSRPVKLNILLVKHWYRQVCPQERRREMPDYALELLTIFAWKCGKDAFSLAQGLRTVLSLIQ  
HQHLRVFWTTNYGFEDPAVKKFLLRQLDRPRPVILDPADPTWDVGNAAWHWDLAREAESCYDSPCFLLQ  
AAGGAVQPWEVPGPLPLTAPPILRDPAQKTPEDSSSLDAVHPRAGNGQSPCPDPPDSVVAIAPCALEVVS  
DLSQIPARELDRFIQDHLKPQPFQKQVSKAFDVLISCLRENGAHKASRVSKGGSFGRGTDLRGGCDAEL  
IVFLNCFKNYKDQGPLCAEVLRLDLRAQLESQGEFVPGTLTKFAAQTTTKALRFQLVSSALKSWMDVSL  
PVFDDAVGQLSSGTPKDPQIYSTLLDSCQDGEHAACFAELRRNFVNSRPVKLNILLVKHWYRQACQGE  
RRREMPDYALELLTIFAWKCGKDAFSLAQGLRTVLGLIQHQHLRVFWTTNYGFEDPAVKKFLLRQL  
DRPRPVILDPADPTWDVGNAAWHWDLAREAESCYDSPCFLLQAAGGAVQPWEVPGPLPLTAPPILRDPAQ  
KTPEDSSSLDAVHPRAGNGQSPCPDPPDSVVAIAPCALEVVS DLSQIPARELDRFIQDHLKPQPFQKQ  
VSKAFDVLISCLRENGAHKASRVSKGGSFGRGTDLRGGCDAELIVFLNCFKNYKDQGPLCAEVLRLDLRAQ  
LESQGEFVPGTLTKFAAQTTTKALRFQLVSSALKSWMDVSLPVFDDAVGQLSSGTPKDPQIYSTLLDSC  
QDGEHAACFAELRRNFVNSRPVKLNILLVKHWYRQVAAQNEGGRPACASLPFALELLTIFAWEQG  
CGKDRFSMAEGLRTVLRLVQHQQLSVFWTVNYSFEDPALRTHLLGQLRKPRPILDPADPTWNVGQGSW  
ELLAREAAALETQACITSSSEGTVPVPWDMPTLLRQTASDLDFKISALLQPNQQFLDQVAKAVDTICSF  
LRENCFRNSPTKVLKVVKGSSAKGTALQGRSDADLVVFLTCTFSQFTEQGSNRAEIISEIRAQLEACKQE  
LQFDVKFEISKWENPRVLSFSLTSPTMLDQSVDFDVLPAFDALGQLGSGSKPPAHVYVDLIRSNNAGEY  
ACCFTELQRDFIVSRPTKLSLRLVKHWYQQCNMMPKKGSLPPQHGLELLTVYAWEQGGQDPQFNMAQ  
GFRTVLELVTRYRQLCVYWTNYSWEDESIDFLKLQLQKPRPIILDPADPTGNLGHNRWDLAREAAA  
YISALCCMDKDGTFPVQWPFVKA

>XP\_036126503.1 2'-5'-oligoadenylate synthase 1-like [*Molossus molossus*] = OAS5  
MQLRDTQARFLDKFIEENLLPDPFPRLQVRQATHHICGFLKEECFQGAPHRVRVSKVVKGSSGKGTTLR  
GRSDADLVVFLSPLTSFQEQFDRRGEFIQEIKKQLQAFQRETGENFEIRDSGWQNPVLSFVFS SPM LND  
SVEFDVLPFAFDVLGQLTGPPDPKIYVQLIDECTRLGKEGEFS PCFTELQRDFLQRPRTKLKSLRLVKHW  
YQVCKEKLKGLPPLPQYALELLTVYAWERGSNRSEFSTAQGFRTVLELVNMNRYMLCIYWSKYNFENFVIG  
AYLRKQLQKPRPVILDPADPTGNVAGGHPQSWPRLAQEALAWLSYPCFKNWDGSPVGSWNI

>XP\_036132778.1 2'-5'-oligoadenylate synthase-like protein [*Molossus molossus*]  
MALFPELYGTPASRLDSFVAQWLQPSREWKEEVLEAVRTVEQFLREETFQGERGLDQEIRVLKTVKVGSGF  
GNGTVLRNTEVLELVFLSPCFRSPQEEAKHHQAVLRLIQKKLWTS PDLLALGLEVLGVFGQVDPALVFTI  
QTRETAEPITVTIVPAFRVLGSPVNSQLHPGVVSLIGANGFAGNFSPSFCELRNFVKHRPTKLNLL  
RLVKHWYLYQVYKARCPKAMLPPIYALELLTIYAWEMGTQENESFRLDEGLTTVMELLQYESLCIYWTRH  
YTFENPVIEDAVRKQLQRERPIILDPADPTHNAEGYRWDIVAQRACQCLKQDCCYDSKNNPVPSWNVKR  
ARDIQVTEQWGLVPDLILVNPYEPPIRVKEKIRRRQGCGLQLRSLFQTPSGERKLLSSRSLADYGI  
NTQICLLETTSPEIQVFVNPDGGSHAYIDPNSFILGLKHQIEDKQGLLRKQQQLQFRGQVLQDWSSFR  
SYGIEDSDTLILSKKKDTDFLFLPS

>XP\_036210168.1 2'-5'-oligoadenylate synthase 1 isoform X1 [*Myotis myotis*]  
MWPLQAIIVARDLEVIPAKDLDRFIEHLLPDTAFRMQVKQAIDIICSLKERCFLQDRVRVSKVVKGSS  
GKGTALDRSDADLVVFLSPLTSFQEQFERRGEFIQETRTQLEACQQRMFTVRFEVQPKFQNPRLSFT  
LKSRSSRAEAEVEFDVLPAYDVLGQVTEPYRDPDIYVRLIRECERLKGEGFS PCFTELQRAFLKQRP  
KLKSLIRLVKHWYQKCKEKLQSLPPQYALELLTVYAWERAGRQTDFTTAQGFQTVLELVNMNRYQLRIHW  
TQYYDSSHPVIGPYLRRQLQKPRPVILDPADPTGNVAGGKPERWEPLAGEARAWMKYPCFRKGDGSPVGS  
WNI

>KAF6282567.1 2'-5'-oligoadenylate synthetase 2 [*Myotis myotis*]  
MGNWLSWLSGACPKTVSVPAQKLDEYIQTS LRPTEDCQRQIDEAVDTICAALQEATEPPTVTDVAKGGS  
YGRKTVLKGNSDGLTIVIFISDLKFKQDQKENQHEILDKIWEQLRACQLERKLTVKMEMQRSNGDLTVRLS  
TRWQSVTFDVLPAFDALDLSGKPS PSTYRDLKRALDQTKASPGFEFSVCFTKLQEDFFNKHPRKLDLILL  
VKAHWRQCKLWGDQSLPSPSYALELLTVYAWEEGCREEDFDIVQGLRTVLELIEQQEQCLCVYWTNYNFE  
DETVRNVMNLNQRSSRPVILDPDPTNMMSNDETCWRLKAEQNWLSLSLGS GSPSWNVLPAPIHET  
PGHLLDKFIKDFLQPTKKVNIQIKAAVGIISKFLKEICFRHSATKVQKPIKAGSSGKGTALRTGSDADLV  
VFVDSLTSFSPSQKTERYNIKEIKHQLEAHQQQVTDQDVEVTFEISKWEAPRVLSFSLKSKHLNGSVDFD  
VLPAFNALEKLGPLWKVYTKLIAQYEQHS DTPGGEFSACFTELQRDFVSSRPRTKLNLLRLVKHWYKQCE  
RLKKGKSLPPKYALELLTIYAWEQSGGATSFDTTQGFRTVLELVTRYQQLCVFWTVNYNFENETVRNFL  
LKQLQRPVILDPADPTGDVGGGNRWCWHLLANEAAEWLSSSLCFKDGTTGGPVPSWKVPTVQTPGSCGA  
GVGPVINEMFSSRRRGILD

>KAF6282568.1 2'-5'-oligoadenylate synthetase 3 [*Myotis myotis*]  
MDVYRTPAAALDGLVASSLQPPAEFVGTVRRALGDLGALRERGGRP GPGPGGAAAPAWRVLKIAGKGS

SGRGTA LRGGCDSELVVF LDCFKSYEDQRALQTEILKEMRVLVGSWWQKPVPGLSLKF LKQDTPGALQFR  
LASTDLENWMDISLVPADFALGQLSSSVKPKPQVYATLLES GCQKGEHAACFAELRRNFMNTRPAKLKNL  
ILLVKHWHRQVCPKAGQNMP PAYALELLTIFAWEQGCGKEAFSLAQGLRTVLGLIQQYQHLCVFWTTNY  
SCEDPAVKKFLQRQLEGPRPVILDPADPTWVDVGNGA AWRWDL LAQEAESCYDSPCF LQAAGGAVQFWEGP  
GLPRTGRSGVDHPILRDSAQRTPTDSSSV DAGCSRAGDRRPSCPAPGPSVDGITPGTPEGVPGLSQVP AK  
ELDRFIQDHLKPSQFQKQVSKAVD GILGRLEN CVYKASRVGKGGSFGRGTDLRGGCDAELVIFLNCFE  
NYKDQGPRAEILADMRQLESWWRDPVPG LTLNFP EQTMTKALQFQLMSPALASWVDVSLLPVFDVAGQ  
LSAGTKPDPKIYRTLLDSGCQDGEHRACFAELRRSFVNSRPTKLKSLILLVKHWHRQVAARNKGERPARA  
SLPPAYALELLTIFAWEQSGKDRFSTA EGLRTVLGLVQQHRQLCVFWTVNYSS EDPALRAHLLGQLRKP  
RPLILDPADPTWNVGLGSWELLAQEA AALETQACFMSADGTPVQPWDVMTLLYQTPARDLDKFI SDFLQ  
PNRQFLAQVNKAVDITICSFLENCFQNSPIKVLKVVGKSSAKGTALRGRSDADLVVFLSCFGQFTEQGS  
TRA E VISEIRAQLEVCKRARQFEVKFNLPK WENPRVLSFSLTSQTMLDQSVDFDVLPAFDALGQLAPGSR  
PPQVYVDLIRSNTPGEYSSCTELQRDFVDRPTKLKSLIRLVKHWYRQCKMPKKGSLPPQHGLEL  
LTVYAWEQGGQDPQFGMAEGFRTVLELVTQYRQLCVYTVTNYSREDQTVKDFLEQQLRKPRPIILDPADP  
TGNLGP NARWDL LAKEAAACMSLCCIDRDGTPIQPWPVRAAV

>XP\_036199939.1 2'-5'-oligoadenylate synthase 1-like [*Myotis myotis*] = OAS5  
MELSLTPARNLDKFIEDHLLPDPFRRTVKKAVNAICSF LKERCFCQGASHCVRVSKVVKGSSGKGTTLR  
GRSDADLVVFLSLRFSQELDRRGEFIWEIIRQLEAFQRETGVFEIHKPQREKPRALS FVFRSPGLDE  
KVEFDVLPADFVLGQWGTVPPIHAGYRPDPHIYVRLIHECTRLGKEGEFS PCFTELQRAFLRQRPTKLKS  
LIRLVKHWYQLCKQR LGEPLPPQYALELLTVHAWERGCKETYFSTAEGFRTVLELVVHYRQLCVYWTKY  
NFENPVICQYLMTQLEQPRPVILDPADPTGNVAGGGGWQLAQEA AAWLRYP CVENRDGSPVDSWDTGLP  
REREDSWTCAIL

>XP\_036209649.1 2'-5'-oligoadenylate synthase-like protein isoform X1 [*Myotis myotis*]  
MPGAGCVTTPLPGWVLSHSHGTVRGDGAVRHPC LQAGLLRGSVPAAQPGVEGRGAGGREDRGAVPEGRAP  
RGRVWATPGGAGAEAGGLLRERHARGQRGGAAGGLSELRLRPGGGRAPRRRAEADPEHAVDLPGPA  
GPRARGPGGVPGRPRCSRLHRPDQVDRGAGHRHRRAGLQGPGAFCSPLAAAPRGLCEPGEGLPVPRASLS  
FLLRAAERLREAPAHQAE EPPAAGQTLVVRARS PRAALPLYALELLTIYAWEMGTQENESFR LDEGLTT  
VMELLQEYESLCIYWTKYTFQNP IEDVVRKQLQRQRP IILDPADPTYNVAEGCRWDIVAQRACQCLKQ  
DCCYDSKDNPPVSNVVKRARDIQVTVEQWGPCDWTLMVNPYSSIKKVKEKIQRRQSC EGLQRLSFQTPSG  
ERKLLRSRSSLAEFGIFSDTRICLLETIPPEIQVFVRNPEGGSHAYAVDPNSLVGLKQ QIEDKQGLLRK  
QQELQFLGQVLQDWSVLGSYGIKDSDTLILSKKKDTHFPFLPS

>XP\_036989359.1 2'-5'-oligoadenylate synthase 1 [*Artibeus jamaicensis*]  
MELRRTSAKDLDFIENHLLPDSPPFRDRVNEATHIICSFLKERCFLQGGGRPVRLKVVGKSSGKG TAL  
RGRSDADLVVFLSSFGSFQE QFDHREEFIQEIRRQLEACRREKMFQVQFEIRKNTAMMQSHNTAVVQSHR  
WGNSRVIRKPRLSFTLS SCWSQCPQEGVEFDVLPADFVLGQVTKDYRPDPQIYVKLIQECEGLGREGEF  
STCFTELQRAFLKQRPAKLKSLIRLVKYWYQECKQELGHPLPPQYALELLTVYAWERGSREADFIMAE GF  
RTVLELVNLYRRLCIYWTKYDYTNH SVIGPYLRRLQKPRPVILDPADPTGNVGADNPPGGWERLAGKAR  
DWLTYPCFKKWDGSPVGSWNVQI

>XP\_036989379.1 LOW QUALITY PROTEIN: 2'-5'-oligoadenylate synthase 2 [*Artibeus jamaicensis*]  
MGNWFSSACPVTNSVPAQRLGEYVQNFLRPSDDCQRQIDEAMDTICAAL EEAELPTVTDVAKGGSYGR  
KTVLRGNSDGLTVIFISDLGQFQDLKRKSQREILNKICKWLKAAQLEQKLAAKMEIKRPWGGGLTIQLST  
RWQSVTFDVPFADFVAGFRNEPCLRTYRELKRLDMTKASPGFEFVSCFTKLQKFFNHHPRKLDLILLV  
KAWYQCQCKKWKDTS LPPSYALELLTVYAWEQGCGAENFDLAEGIRTVLELIKGP EELCVYWTVNYNFD  
MTVRNVLISQIRSPRPVILDPDPTNNVSKDKTGWQLLKEEAQLWLS SPSLKEPPGPSWNVLPMPLEETP  
GHR L DAFIKKFLQPNQTF LNQMS S AVDICTFLREQC FRDSSTKVQKPVKGGSTSGKTALKTGS DADIVL  
FIDSLVGYSQKNEVSIVVQKIRNQL EAFQRREAREQFEVKFEISKWNDPKVLSFSLKSKEFSDSVDFD  
VLPAYNALGQVHAGVRPHPRVYTDLISLYKRLDLVGGEFS PCFTELQRDFVLSRPTKLKDLIRLVKHWYK  
QQCAKLEKGS LPPKYALELLIYAWEQGAGADFDTAEGFRTVLELVTYQQLCIFWKVNYNFDNQTVKD  
FLLTQIQKTSWRGQAQPRAREPGRPLGAESNPSRQLAPERGPPPCNRVEFAPPTAQKPRASSWTCGTHSS  
ATRQAAGL

>XP\_036989355.1 2'-5'-oligoadenylate synthase 3 isoform X1 [*Artibeus jamaicensis*]  
MDVYRTPATTLDGLVTSIQLTAEFVGTARRALGTVGAVLRECGRPGARVAAAPPWRVLKITKGGSFGRG  
TALRGGCDSELVVF LNCFKSYEDQRRARRREILGEMRVLLESSWQNVSGLSLEFLKQDMPGVLFRLAFP  
DLDDQMDVSLVPADFALGQLSSHVKPKPQVYSALLNSGCQRGEHAACFAELRRNFVNTRPPKVKNLILLV  
KHWYRQVCPQEGSREMPPAYALELLTIFAWEKCGCKDAFSLAQGLQTVLGLIQQYQHLCVFWTTNYGFED  
PVVKKFLLHQLERPRPVILDPADPTWVDVGNGA AAWWDL LAQAAGSCCDRFPFLQAVGGAVKPWEVPGLPR  
PGRSGLDLP ILEDPA REPSRDS SGLS AACPGAGNRRPFRPAPVFSALDLCQIPSWELDRFIMDHLKPD TL  
FQRQVSKAIDVILSCLREKCVHKASRVSKGGSFGRGTDLRGGCDAELVIFLNCFENYKDQGPRAAILDD  
MWAQLESWWQDPVPG LTLSFPEQTMTEALQFHLVSP TLKSRMDVSLLPVFDVAGQLSSGTKPDQPIYCTL  
LDSGCQEGEHAACFSELRRNFVNTRPAKLKNLILLVKHWYRQTVQVASRN RAGWPACASLPPAYALELLT  
IFAWEQSGSEHRFHMANGLRTVLGLVQQHQQLRVFWTVNYSFEDPALRMHLLS QLQKPRPLILDPADPTW  
NVGRGSWELLAQEA AALESQACLSREGIPVQPWDVPTLLHQTPARDLDKFI SDVLPDRQFLGQVHKA  
VDTICSFLENCFKPNLP I KVLKVVGKSSAKGTALRGHSDADLVVFLSCFHQFTDQGSRAEIISEIRAQ  
LERCKQEQQFEVKFEISR WENPRVLSFSLASQTMPDQSVDFDVLPAFDALGQLGSGSRPHPRVYADLIRS  
CSNAGEYSCCFTELQRDFIVSRPTKLKSLIRLVKHWYRQCTKKPKGKGS LPPQHGLELLTVYAWEQGGRD  
PRFNMAEGFRTVLELVTRYRQLRVYWTVNYNCEDETIRDFLRTQLQKARP IILDPADPTGILGHSARWDL  
LAEEAAAYMSAPCCMDRDGTPILPWPVKA AV

>XP\_037010350.1 2'-5'-oligoadenylate synthase 1-like [*Artibeus jamaicensis*] = OAS5  
MCQEANTRSQLLPSQERKPKPVQTGQKTQRLRVSRRLCGHCSFVPCQSVKME LSEIPARCLDKFIEDH  
LLPDTHFMRQVKEAINVICSF LKERCFCRGASHPVVRVSKVVKGSSGKGTTLRGRSDADLVVFLSNLGSFQ  
EQFDGRAEFIREIKKQLTACQSERGVQFKIRDGGWNNPRSLSFVLR SFWVEGVEFDVLPADFALGQVPKG  
YAHDSLVPEDYRPDPQIYIELIQECKLKGEGEFSTCFTELQRAFLKQRPTKLKSLIRLVKHWYQTCKEN

LGKPLPPQYALELLTVYAWEQNGKTVFSTAQGFRTVLELVMNYQKLLIYWTKYYSFENPVIGQYLMMLQ  
KKPRPVILDPADPTGNVAGGDPSPWRLAQEAKAWLSYQCFKNWDGSPVSPWYIQLPAESEDGWTCAIL

>XP\_037012124.1 2'-5'-oligoadenylate synthase-like protein [*Artibeus jamaicensis*]  
MALSPELYGIPASRLDSFVAQWLQPNREWKKEVLDAVRTVEQFLRAEAFQGEDGLDQEVQVLKVLKVGGSF  
NGTTLVRSSAEVELLVFLSCFHSFQQEAKHHQAVLRMIRKKLWTCQDLLALGLEVLGLVQGVDPALTFTI  
QTRWTAELVTVTIVPAYRALGPSVSNQPHPEVYVSLIKAGGYPGNFSPSFCELRNFVKHRPTKLKSL  
RLVKHWHYLQYVAKACPRANLPPFYALELLTIYAWEMGTLEDENFSLDEGLVTVMELLQKYQSLCIYWTRH  
YAFENPIEDCVRKQFQRRERPIILDADPTNVAEGYRWDIVAQRANQCLKQDCCYDNEETPVPSWNVKT  
ARNITVTVEQWGYPDILILVNPHETIKNVKKIRRRQGYSGQQRLSFQQPSGERQLLNGCSSLADFGIFS  
DTCISLLETMAEILVFKNPGGSHAYAIDPKSFVLSLKQQIEDKEGILRNQQLEFQGVLDWLAF  
GYGIKSDTLILSKKKVRRVPFVLS

>XP\_010597281.1 2'-5'-oligoadenylate synthase-like protein isoform X1 [*Loxodonta africana*]  
MALAQELYDTPASRLDSFVAQWLQPSREWKEEVLGVVTVRVERFLREEHFQGDRLDQEVRLKVKVKGGSF  
NGTTLVRGTAEVELLVFLSCFRSFQEEAKYHQAVALRLIKKKLWRCQDLLALGLEDLWVAQAGALVFTI  
QTSGIEELITITIVPAYRALGPLAPNFQPPDVYVSLIKAHGYPGNFSPSFSELRNFVKHQPTKLKSL  
RLVKHWHYLQYVAKACPRANLPPFYALELLTIYAWEMGTQKDNFRLDEGLTTVMELLQYAEFVCIYWTKY  
YTFQNLVIENFVVKQLKDRPIILDADPTNVAEGYRWDIVAQRACQCLKQDCCYDNEETPVPSWNVKR  
ARDIQVTVEQRNYFDLILVWDPYEPKIKIREKIQQNRGYSGQLRSLFQEPGGERQLLSSHCSLAYYGVS  
NTRIYLLLETFSPEIQVFVKNQDGRSHAYAIDPNNCILRLKEQIEDRLGLLRQQLEFRGQVLDWLDFG  
CYGIQSDTLILSKKKASEAPFLHS

>XP\_023415269.1 2'-5'-oligoadenylate synthase-like protein 2 [*Loxodonta africana*]  
MEHLQNLVETPADRLDAFVSHSLQPPQGDWKEEVQDAWQRIERFLRDQCFRDELVDQEVRLKVKVKGGS  
GKGTTLNYSDDVMVFLSCFSSFQNLALRKDIHFTQEKLDHRSRLAYNISLVQPRERARAPRSLF  
RVQSRKSEAIWVDVLPFAFNLGSEFCPTKPSPEVYEDLITSAGQPGFSSSTELQKHFKVSCPTKLK  
LLRLVKHWHYLQHLKPKYRKVQLPSKYALELLTIYAWEMGTDESENFMDDEGFVAVMKLLRDHEDICIYWT  
KYDYFQNEIVRNLYKQKLECRPIILDADPTNNLGKGRWDLVAKEAVHCLRPCCDIEDPGQGWHIQ  
ARDVQVTVKSGEEAQTLSVNPYSPIWMKKEIKNMFFLNGHQRSLFQEPGGRQPLSSQKTLADYGFIS  
KVGIRVLETFPPEIQIFVKEPSGQNRPAVRPDGLIWHLKTNIEAAGPCLEDQILKFQGRNLRNHLSLR  
DLQIRTVTHHPIRRGCQVPGKRHRFLLGPSQVRLS

>XP\_012629210.1 2'-5'-oligoadenylate synthase 1-like [*Microcebus murinus*] = OAS4  
MWALKFYNCHEGSDVFSHTALYHLRLKHLGKVHCEECGQEVLEKLEHDSKSVHDSIVETHNLNWN  
LEDRSIKHVATKISKTHMCSEYFGTVHSQEIPEIQEHFIANKRAQMSTGFSPHNMLECKSPQELERFA  
DENIRPASGPLSAACVAEIGAFTELIQGCFPAPASRVIGGGSYTKGTDQGCSEVDIVLFSDFVFNVNC  
KKQLREGLDVLRLNKLQTSRGNRIIMKKRTSLSLRFLCIESLHSHSFEIMAYYDVLGSPSPSKDLKHL  
YRKLYLCNDIEEAQLCALALLPYQVDFVKASIVRVKELIRLMTWHFKTSFAKPTKKNKFRRLPSSYAVEL  
LSIYIWEFLAGKLLFSLVQGMRAVLKLLVRYAEIDIVVHRHYHSKFPIFVKVKQKHTRPFILDPVNPTVN  
VCDTCNAWDEVARVARCSLCQPLFSGVRAKPPWLTDDWY

>XP\_039400985.1 2'-5'-oligoadenylate synthase 1-like isoform X1 [*Mauremys reevesii*] = OAS4  
MDKGDSEGHSCASCKNPLGLASCAESYYEITRKSQPEMKVWAEHGHITAGCCPYSGAQRERERMGSLKF  
YNCEQCGNDFVSRALTALRYHFRAKHLGKVHCEKCGREVLRETLDHEAANHERMTAERQGCFFWDMPPKREA  
KFVAIEMTSCRMCPKRGFTIHSREHHEKQDHFQASKRAQMATGFSPDNILDYKNPTELKRFVVEEKL  
VPGPASIACATETEAIIINLIKECFPLPIARLIKGSYIKGTDQGWSDVDIVLFSEAFENLEDCKKKLPE  
VIDDLGKRLKSSWASRIMMEKRTQSSLRHFHFKCYKNHHGHSFDIMPCYDMLGPAPSTGFKQSFYHKIYL  
CNDTDEIQLYSMSLLQYQVEFIKASTMKVKDLIRLVKHWFRSTFAKPTAQNKFRLPSSYAIELITISIW  
QLAGKPVFFSLIQGMRAILMLLVRYPEMCIVWHKHYSNPMIFKAFQKQTRPFILDPANPTLNCNSN  
AWDEVAHVARRSLKPLFNGVQAKEPWLFTNDW

**Figure S1. Amino acid sequences of OAS family proteins encoded by genes which have been investigated in this study.** Amino acid sequences of OAS proteins are shown in FASTA format. Annotation as OAS4 or OAS5 is indicated at the end of the name. Note that some proteins are designated “low-quality” in GenBank because the nucleotide sequences of the corresponding genes contain at least one frame shift or premature stop, which may be attributed to genome sequencing errors or genuine mutations. The position of ambiguous sites is marked by X (red font) in the sequence. OAS1 and OAS2 of the Chinese pangolin (*Manis pentadactyla*) were predicted as described in Figure S3. In addition to proteins listed in Table S1, this list contains sequences of proteins which were used for inferring the evolutionary origin or loss of OAS family genes during the evolution of vertebrates. The latter proteins are from the following species: African savannah elephant (*Loxodonta africana*, order: Proboscidea, superorder: Afrotheria); gray mouse lemur (*Microcebus murinus*, order: Primates, superorder: Euarchontoglires), Reeves' turtle (*Mauremys reevesii*, order: Testudines, class: Reptilia).



**A**

*Manis pentadactyla* OAS1

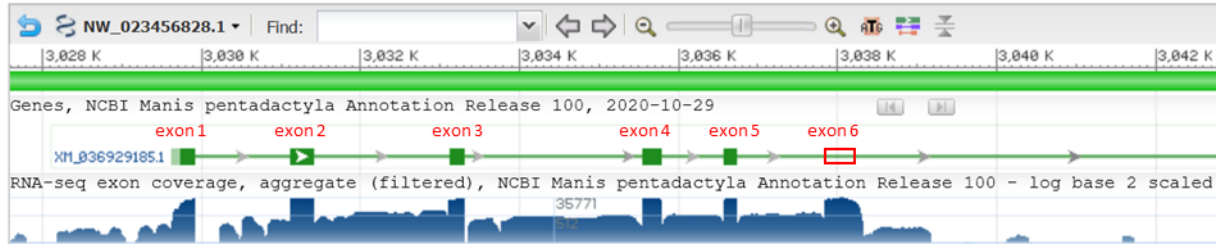

**B**

*OAS1* exon 6 (coding sequence)

ccatgtgctttaccctttcag**cccagagacaacctctgctccataccctga**gtatggaca  
P R D N L C S I P \*

**C**

*Manis pentadactyla* OAS2

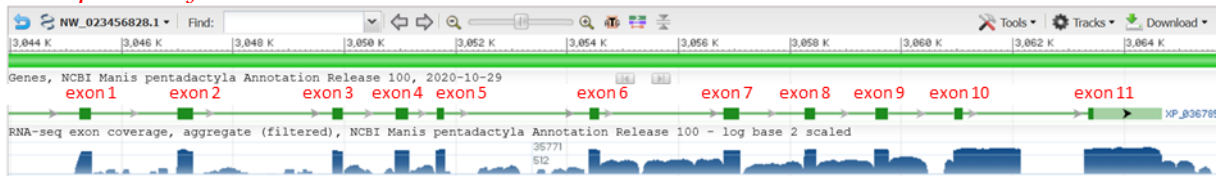

**D**

*OAS2* exon 1 (coding sequence)

ctctgcctccctctctgcccattagctgtcacctcagcagccagcagaagcc**atgggcaac**  
M G N  
**tg**ggaa**tcc**catctgtattcagtgccctcctcagaaactgggtgagttgtccagaactcc  
W E S H L Y S V P P Q K L G E F V Q N S  
**ct**gagacc**ctt**gaagattgtcagaaaaagatcgacgagaccgtgaacaccatctgcgct  
L R P F E D C Q K K I D E T V N T I C A  
**gt**cctgcaggaagctgagcagttcccccctggtcataagtggtggtataa**gt**gagtacaggg  
V L Q E A E Q F P L V I S V A K

**Figure S2. Prediction of exons for OAS1 and OAS2 genes of the Chinese pangolin (*Manis pentadactyla*).** GenBank Gene views of LOC118934083 2'-5'-oligoadenylate synthase 2-like [*Manis pentadactyla* (Chinese pangolin)], Gene ID: 118934083, updated on 29-May-2021. The LOC118934083 gene prediction in GenBank erroneously links the OAS1 and OAS2 genes. Positions of exon 6 of OAS1 (A) and exon 1 of OAS2 (C) are indicated in the Gene views. Nucleotide sequences of exon 6 of OAS1 (B) and exon 1 of OAS2 (D) contain coding sequences (red fonts) and adjacent sequences. The amino acid sequence is shown below the coding sequences. Splice donor and acceptor sites are underlined.
